# Supplementary material
Source: MDPI journal article supplement (https://www.mdpi.com/2673-8937/3/1/6)
Supplement: s1 [file s1]

**Table S1.** Mean irradiance (of dosimeter C3 values in %) measured by each of the 31 dosimeters on each of the 12 participants with different body shapes in treatment unit A (a). Percent of calibration value for each dosimeter and each person in treatment unit A (b). Person 1 is the shortest and person 12 the tallest.

| a       | Head / Shoulder |     |     |     |     |    |    | Trunk |     |     |     |     |     |     |    | Arm |     |     |     |     |     |     |     | Leg |     |     |     |     |     |     |     | Mean | SD | RSD (%) |
|---------|-----------------|-----|-----|-----|-----|----|----|-------|-----|-----|-----|-----|-----|-----|----|-----|-----|-----|-----|-----|-----|-----|-----|-----|-----|-----|-----|-----|-----|-----|-----|------|----|---------|
| Subject | H1              | H2  | H3  | H4  | S1  | S2 | S4 | C1    | C2  | C3  | C4  | B1  | B2  | B3  | B4 | UA1 | UA2 | UA3 | UA4 | LA1 | LA2 | LA3 | LA4 | UL1 | UL2 | UL3 | UL4 | LL1 | LL2 | LL3 | LL4 |      |    |         |
| 1       | 103             | 101 | 102 | 109 | 101 | 74 | 68 | 91    | 37  | 100 | 0   | 90  | 37  | 83  | 59 | 115 | 109 | 93  | 14  | 112 | 110 | 87  | 6.2 | 97  | 91  | 87  | 36  | 114 | 88  | 102 | 18  | 79   | -  | 43      |
| 2       | 115             | 111 | 70  | 116 | 109 | 56 | 60 | 107   | 2.4 | 100 | 0   | 104 | 43  | 100 | 9  | 125 | 116 | 86  | 3.3 | 127 | 115 | 42  | 27  | 129 | 120 | 112 | 6.3 | 115 | 118 | 112 | 62  | 81   | -  | 53      |
| 3       | 111             | 103 | 97  | 118 | 109 | 75 | 66 | 108   | 0.1 | 100 | 0   | 112 | 70  | 105 | 94 | 120 | 117 | 107 | 13  | 124 | 119 | 91  | 9   | 122 | 115 | 108 | 26  | 103 | 104 | 95  | 58  | 87   | -  | 43      |
| 4       | 119             | 125 | 109 | 123 | 119 | 87 | 85 | 109   | 4.7 | 100 | 3.3 | 108 | 64  | 95  | 43 | 128 | 119 | 36  | 18  | 128 | 122 | 96  | 15  | 128 | 107 | 118 | 39  | 116 | 116 | 112 | 74  | 89   | -  | 44      |
| 5       | 117             | 118 | 96  | 123 | 118 | 66 | 78 | 103   | 0   | 100 | 0   | 103 | 29  | 103 | 61 | 130 | 123 | 97  | 6   | 133 | 125 | 62  | 22  | 138 | 121 | 111 | 9.3 | 106 | 117 | 121 | 56  | 87   | -  | 49      |
| 6       | 126             | 125 | 102 | 119 | 123 | 78 | 88 | 106   | 0   | 100 | 0   | 108 | 31  | 99  | 14 | 134 | 129 | 82  | 70  | 134 | 133 | 85  | 21  | 138 | 117 | 128 | 23  | 105 | 103 | 107 | 54  | 90   | -  | 47      |
| 7       | 102             | 96  | 106 | 111 | 103 | 73 | 81 | 88    | 0   | 100 | 0   | 77  | 0.2 | 88  | 0  | 124 | 115 | 61  | 0.1 | 123 | 116 | 56  | 15  | 126 | 118 | 107 | 29  | 99  | 97  | 90  | 46  | 76   | -  | 56      |
| 8       | 103             | 117 | 97  | 121 | 111 | 73 | 59 | 105   | 70  | 100 | 48  | 102 | 76  | 106 | 87 | 122 | 113 | 99  | 34  | 125 | 113 | 75  | 42  | 117 | 110 | 107 | 35  | 89  | 93  | 86  | 51  | 90   | -  | 30      |
| 9       | 116             | 106 | 98  | 114 | 104 | 94 | 68 | 77    | 0   | 100 | 0   | 80  | 72  | 91  | 35 | 123 | 114 | 106 | 0   | 126 | 123 | 86  | 13  | 132 | 116 | 107 | 7.1 | 115 | 113 | 101 | 59  | 84   | -  | 49      |
| 10      | 115             | 116 | 97  | 113 | 109 | 81 | 84 | 99    | 23  | 100 | 0   | 93  | 49  | 96  | 30 | 143 | 118 | 92  | 0   | 104 | 120 | 101 | 19  | 126 | 102 | 109 | 27  | 96  | 115 | 112 | 64  | 86   | -  | 45      |
| 11      | 87              | 105 | 81  | 113 | 105 | 72 | 66 | 92    | 0   | 100 | 0   | 91  | 18  | 105 | 40 | 115 | 119 | 101 | 0   | 113 | 121 | 90  | 13  | 119 | 115 | 101 | 26  | 99  | 102 | 98  | 59  | 80   | -  | 49      |
| 12      | 75              | 65  | 80  | 78  | 97  | 38 | 38 | 109   | 15  | 100 | 35  | 94  | 54  | 102 | 29 | 124 | 112 | 111 | 15  | 124 | 113 | 92  | 17  | 129 | 118 | 108 | 31  | 115 | 117 | 115 | 66  | 81   | -  | 45      |
| Mean    | 107             | 107 | 95  | 113 | 109 | 72 | 70 | 100   | 13  | 100 | 7.2 | 97  | 45  | 98  | 42 | 125 | 117 | 89  | 15  | 123 | 119 | 80  | 18  | 125 | 113 | 109 | 24  | 106 | 107 | 104 | 56  | 84   | -  | 46      |

b

|      |    |    |    |    |    |    |    |    |     |    |     |    |     |    |     |     |    |    |     |    |    |    |     |     |    |    |     |    |    |    |    |    |    |   |
|------|----|----|----|----|----|----|----|----|-----|----|-----|----|-----|----|-----|-----|----|----|-----|----|----|----|-----|-----|----|----|-----|----|----|----|----|----|----|---|
| 1    | 89 | 88 | 89 | 95 | 88 | 65 | 59 | 80 | 32  | 87 | 0   | 79 | 32  | 72 | 52  | 100 | 95 | 81 | 12  | 97 | 95 | 75 | 5.4 | 85  | 79 | 76 | 31  | 99 | 76 | 89 | 15 | 68 | 30 | - |
| 2    | 86 | 83 | 52 | 87 | 81 | 42 | 45 | 80 | 1.8 | 75 | 0   | 78 | 32  | 75 | 6.7 | 93  | 86 | 65 | 2.4 | 95 | 86 | 32 | 20  | 97  | 90 | 84 | 4.7 | 86 | 88 | 84 | 47 | 61 | 32 | - |
| 3    | 89 | 83 | 77 | 94 | 87 | 60 | 52 | 86 | 0.1 | 80 | 0   | 89 | 56  | 84 | 75  | 96  | 94 | 85 | 11  | 99 | 95 | 73 | 7.2 | 98  | 92 | 86 | 21  | 83 | 83 | 76 | 46 | 70 | 30 | - |
| 4    | 89 | 94 | 82 | 93 | 89 | 65 | 64 | 82 | 3.5 | 75 | 2.5 | 81 | 48  | 72 | 33  | 96  | 90 | 27 | 14  | 96 | 92 | 72 | 11  | 96  | 81 | 88 | 29  | 87 | 87 | 84 | 56 | 67 | 30 | - |
| 5    | 82 | 83 | 67 | 86 | 83 | 46 | 55 | 72 | 0   | 70 | 0   | 72 | 20  | 72 | 43  | 91  | 86 | 68 | 4.2 | 93 | 88 | 44 | 15  | 97  | 85 | 78 | 6.5 | 75 | 82 | 85 | 39 | 61 | 30 | - |
| 6    | 82 | 81 | 67 | 78 | 80 | 51 | 57 | 69 | 0   | 65 | 0   | 71 | 20  | 65 | 9.3 | 87  | 84 | 53 | 46  | 88 | 87 | 56 | 13  | 90  | 76 | 84 | 15  | 69 | 67 | 70 | 35 | 59 | 27 | - |
| 7    | 79 | 74 | 82 | 86 | 79 | 57 | 63 | 68 | 0   | 77 | 0   | 60 | 0.1 | 68 | 0   | 96  | 89 | 47 | 0.1 | 95 | 89 | 43 | 12  | 97  | 91 | 83 | 22  | 76 | 75 | 70 | 35 | 58 | 33 | - |
| 8    | 80 | 92 | 76 | 94 | 86 | 57 | 46 | 82 | 55  | 78 | 38  | 79 | 59  | 83 | 68  | 95  | 88 | 77 | 27  | 97 | 88 | 58 | 33  | 92  | 86 | 84 | 28  | 69 | 73 | 68 | 40 | 70 | 21 | - |
| 9    | 84 | 77 | 71 | 83 | 76 | 68 | 50 | 56 | 0   | 73 | 0   | 58 | 53  | 66 | 25  | 90  | 83 | 77 | 0   | 91 | 90 | 62 | 9.6 | 96  | 84 | 78 | 5.2 | 84 | 82 | 73 | 43 | 61 | 30 | - |
| 10   | 90 | 91 | 76 | 88 | 85 | 64 | 66 | 78 | 18  | 78 | 0   | 73 | 38  | 75 | 24  | 112 | 92 | 72 | 0   | 81 | 94 | 79 | 15  | 99  | 80 | 85 | 21  | 75 | 90 | 88 | 50 | 67 | 30 | - |
| 11   | 66 | 79 | 61 | 85 | 79 | 55 | 50 | 70 | 0   | 75 | 0   | 69 | 13  | 79 | 30  | 87  | 90 | 76 | 0   | 85 | 91 | 68 | 9.6 | 90  | 87 | 76 | 20  | 75 | 77 | 74 | 44 | 60 | 29 | - |
| 12   | 58 | 50 | 62 | 60 | 75 | 29 | 30 | 84 | 12  | 77 | 27  | 73 | 42  | 79 | 22  | 96  | 87 | 85 | 12  | 96 | 87 | 71 | 13  | 100 | 91 | 84 | 24  | 89 | 90 | 89 | 51 | 63 | 28 | - |
| Mean | 81 | 81 | 72 | 86 | 82 | 55 | 53 | 75 | 10  | 76 | 5.6 | 73 | 35  | 74 | 32  | 95  | 89 | 68 | 11  | 93 | 90 | 61 | 14  | 95  | 85 | 82 | 19  | 80 | 81 | 79 | 42 | 64 | -  | - |

**Table S2.** Mean irradiance (of dosimeter C3 values in %) measured by each of the 31 dosimeters on each of the 12 participants with different body shapes in treatment unit B (a). Percent of calibration value for each dosimeter and each person in treatment unit B (b). Person 1 is the shortest and person 12 the tallest.

| a       | Head / Shoulder |    |    |    |     |    |     | Trunk |    |     |    |     |    |     | Arm |     |     |     |     |     |     |     | Leg |     |     |     |     |     |     |     | Mean | SD | RSD (%) |     |
|---------|-----------------|----|----|----|-----|----|-----|-------|----|-----|----|-----|----|-----|-----|-----|-----|-----|-----|-----|-----|-----|-----|-----|-----|-----|-----|-----|-----|-----|------|----|---------|-----|
| Subject | H1              | H2 | H3 | H4 | S1  | S2 | S4  | C1    | C2 | C3  | C4 | B1  | B2 | B3  | B4  | UA1 | UA2 | UA3 | UA4 | LA1 | LA2 | LA3 | LA4 | UL1 | UL2 | UL3 | UL4 | LL1 | LL2 | LL3 |      |    |         | LL4 |
| 1       | 76              | 61 | 79 | 80 | 89  | 34 | 37  | 87    | 41 | 100 | 47 | 80  | 50 | 98  | 59  | 96  | 80  | 58  | 31  | 50  | 86  | 30  | 25  | 62  | 67  | 73  | 35  | 85  | 78  | 97  | 24   | 64 | -       | 37  |
| 2       | 86              | 69 | 32 | 81 | 97  | 20 | 23  | 101   | 60 | 100 | 64 | 89  | 56 | 101 | 62  | 94  | 49  | 70  | 21  | 73  | 86  | 48  | 29  | 98  | 83  | 96  | 7.6 | 76  | 69  | 77  | 49   | 67 | -       | 40  |
| 3       | 84              | 64 | 58 | 80 | 104 | 47 | 32  | 102   | 75 | 100 | 88 | 95  | 44 | 103 | 78  | 97  | 76  | 76  | 23  | 68  | 94  | 45  | 28  | 93  | 83  | 103 | 22  | 74  | 70  | 80  | 42   | 72 | -       | 35  |
| 4       | 99              | 88 | 66 | 76 | 106 | 32 | 38  | 102   | 76 | 100 | 60 | 92  | 56 | 103 | 63  | 96  | 51  | 56  | 7.8 | 78  | 106 | 68  | 38  | 89  | 83  | 100 | 9.6 | 73  | 71  | 85  | 35   | 71 | -       | 38  |
| 5       | 79              | 68 | 41 | 75 | 98  | 20 | 30  | 97    | 43 | 100 | 52 | 94  | 50 | 102 | 60  | 93  | 69  | 72  | 31  | 0   | 88  | 21  | 23  | 95  | 78  | 93  | 0   | 63  | 71  | 85  | 33   | 62 | -       | 49  |
| 6       | 76              | 62 | 57 | 62 | 88  | 17 | 46  | 75    | 55 | 100 | 44 | 76  | 37 | 99  | 39  | 74  | 51  | 67  | 48  | 50  | 88  | 41  | 28  | 84  | 74  | 93  | 5.5 | 57  | 51  | 66  | 21   | 59 | -       | 40  |
| 7       | 69              | 49 | 69 | 63 | 90  | 33 | 34  | 95    | 54 | 100 | 72 | 85  | 36 | 96  | 53  | 89  | 53  | 63  | 23  | 77  | 87  | 50  | 18  | 87  | 83  | 94  | 1.8 | 59  | 63  | 67  | 24   | 62 | -       | 41  |
| 8       | 56              | 76 | 59 | 69 | 95  | 50 | 39  | 96    | 76 | 100 | 65 | 87  | 55 | 105 | 67  | 101 | 56  | 67  | 22  | 79  | 90  | 45  | 31  | 85  | 79  | 95  | 30  | 53  | 59  | 63  | 28   | 67 | -       | 34  |
| 9       | 91              | 61 | 45 | 71 | 95  | 44 | 16  | 100   | 66 | 100 | 51 | 90  | 26 | 85  | 50  | 91  | 56  | 58  | 3.4 | 67  | 95  | 38  | 12  | 88  | 83  | 93  | 0   | 67  | 71  | 80  | 15   | 62 | -       | 49  |
| 10      | 77              | 72 | 53 | 69 | 97  | 33 | 41  | 97    | 73 | 100 | 65 | 90  | 45 | 89  | 47  | 116 | 90  | 59  | 6.4 | 32  | 107 | 48  | 24  | 94  | 85  | 103 | 9.4 | 72  | 72  | 91  | 40   | 68 | -       | 43  |
| 11      | 47              | 60 | 36 | 55 | 75  | 21 | 26  | 78    | 48 | 100 | 65 | 90  | 45 | 105 | 63  | 84  | 63  | 61  | 20  | 64  | 89  | 56  | 25  | 84  | 77  | 93  | 10  | 60  | 69  | 78  | 35   | 61 | -       | 41  |
| 12      | 39              | 22 | 33 | 31 | 67  | 0  | 0.7 | 98    | 49 | 100 | 24 | 100 | 71 | 101 | 85  | 100 | 81  | 73  | 12  | 93  | 109 | 82  | 32  | 104 | 94  | 105 | 15  | 85  | 80  | 95  | 35   | 65 | -       | 54  |
| Mean    | 73              | 63 | 52 | 68 | 92  | 29 | 30  | 94    | 60 | 100 | 58 | 89  | 47 | 99  | 61  | 94  | 65  | 65  | 21  | 61  | 94  | 47  | 26  | 89  | 81  | 95  | 12  | 69  | 69  | 80  | 32   | 65 | -       | 42  |

b

|      |    |    |    |    |    |    |     |    |    |     |    |    |    |     |    |     |    |    |     |    |     |    |     |    |    |    |     |    |    |    |    |    |    |   |
|------|----|----|----|----|----|----|-----|----|----|-----|----|----|----|-----|----|-----|----|----|-----|----|-----|----|-----|----|----|----|-----|----|----|----|----|----|----|---|
| 1    | 77 | 62 | 80 | 81 | 91 | 35 | 37  | 89 | 42 | 102 | 48 | 82 | 51 | 99  | 60 | 98  | 81 | 59 | 32  | 51 | 87  | 30 | 25  | 63 | 68 | 75 | 36  | 86 | 80 | 98 | 24 | 65 | 24 | - |
| 2    | 78 | 62 | 29 | 73 | 88 | 19 | 21  | 91 | 55 | 91  | 58 | 81 | 51 | 92  | 56 | 85  | 45 | 63 | 19  | 66 | 78  | 43 | 27  | 89 | 75 | 87 | 6.9 | 69 | 63 | 70 | 44 | 61 | 24 | - |
| 3    | 74 | 57 | 52 | 71 | 92 | 41 | 29  | 91 | 66 | 89  | 78 | 84 | 39 | 91  | 69 | 86  | 68 | 68 | 21  | 60 | 83  | 39 | 25  | 82 | 74 | 91 | 19  | 66 | 62 | 71 | 37 | 64 | 22 | - |
| 4    | 90 | 80 | 60 | 69 | 97 | 29 | 35  | 93 | 69 | 91  | 54 | 83 | 51 | 93  | 57 | 87  | 46 | 51 | 7.1 | 71 | 96  | 62 | 35  | 81 | 76 | 90 | 8.7 | 66 | 64 | 77 | 32 | 65 | 25 | - |
| 5    | 76 | 65 | 40 | 72 | 94 | 19 | 29  | 94 | 42 | 96  | 50 | 91 | 48 | 98  | 57 | 90  | 67 | 70 | 30  | 68 | 85  | 20 | 22  | 92 | 75 | 90 | 0   | 61 | 69 | 82 | 31 | 62 | 27 | - |
| 6    | 77 | 63 | 58 | 63 | 89 | 17 | 47  | 76 | 56 | 102 | 44 | 78 | 37 | 101 | 39 | 75  | 52 | 68 | 49  | 51 | 89  | 42 | 28  | 85 | 75 | 95 | 5.6 | 58 | 51 | 67 | 21 | 60 | 24 | - |
| 7    | 61 | 43 | 61 | 55 | 79 | 29 | 30  | 84 | 48 | 88  | 63 | 75 | 32 | 85  | 47 | 79  | 47 | 56 | 21  | 67 | 77  | 44 | 16  | 76 | 73 | 83 | 1.6 | 52 | 55 | 59 | 21 | 55 | 23 | - |
| 8    | 51 | 69 | 54 | 63 | 87 | 45 | 36  | 87 | 70 | 92  | 59 | 80 | 50 | 96  | 62 | 93  | 51 | 62 | 20  | 72 | 83  | 41 | 28  | 78 | 73 | 87 | 27  | 48 | 54 | 58 | 25 | 61 | 21 | - |
| 9    | 79 | 53 | 39 | 61 | 82 | 38 | 13  | 86 | 57 | 86  | 44 | 78 | 23 | 73  | 43 | 79  | 49 | 50 | 2.9 | 58 | 82  | 33 | 9.9 | 76 | 71 | 80 | 0   | 58 | 61 | 69 | 13 | 53 | 26 | - |
| 10   | 71 | 66 | 49 | 64 | 89 | 30 | 37  | 89 | 67 | 92  | 60 | 83 | 41 | 82  | 43 | 107 | 83 | 54 | 5.9 | 30 | 98  | 44 | 22  | 87 | 78 | 95 | 8.6 | 66 | 67 | 84 | 37 | 62 | 27 | - |
| 11   | 47 | 60 | 36 | 55 | 74 | 20 | 26  | 78 | 48 | 100 | 65 | 89 | 44 | 104 | 63 | 84  | 63 | 61 | 20  | 64 | 88  | 56 | 25  | 84 | 76 | 92 | 10  | 59 | 69 | 78 | 35 | 60 | 24 | - |
| 12   | 36 | 20 | 30 | 28 | 61 | 0  | 0.6 | 90 | 45 | 92  | 22 | 92 | 65 | 93  | 78 | 92  | 75 | 67 | 11  | 86 | 101 | 75 | 29  | 96 | 86 | 97 | 14  | 79 | 74 | 87 | 32 | 60 | 32 | - |
| Mean | 68 | 58 | 49 | 63 | 85 | 27 | 28  | 87 | 55 | 93  | 54 | 83 | 44 | 92  | 56 | 88  | 60 | 61 | 20  | 62 | 87  | 44 | 24  | 82 | 75 | 88 | 11  | 64 | 64 | 75 | 29 | 61 | -  | - |

**Table S3.** Mean irradiance (of dosimeter C3 values in %) measured by each of the 31 dosimeters on each of the 12 participants with different body shapes in treatment unit C (a). Percent of calibration value for each dosimeter and each person in treatment unit C (b). Person 1 is the shortest and person 12 the tallest.

| a       | Head / Shoulder |    |    |     |    |    |    | Trunk |     |     |     |     |    |     |     | Arm |     |     |     |     |     |     |     | Leg |     |     |     |     |     |     |     | Mean | SD | RSD (%) |
|---------|-----------------|----|----|-----|----|----|----|-------|-----|-----|-----|-----|----|-----|-----|-----|-----|-----|-----|-----|-----|-----|-----|-----|-----|-----|-----|-----|-----|-----|-----|------|----|---------|
| Subject | H1              | H2 | H3 | H4  | S1 | S2 | S4 | C1    | C2  | C3  | C4  | B1  | B2 | B3  | B4  | UA1 | UA2 | UA3 | UA4 | LA1 | LA2 | LA3 | LA4 | UL1 | UL2 | UL3 | UL4 | LL1 | LL2 | LL3 | LL4 |      |    |         |
| 1       | 73              | 68 | 89 | 78  | 92 | 61 | 49 | 91    | 54  | 100 | 9.5 | 97  | 37 | 84  | 50  | 119 | 112 | 99  | 7.8 | 110 | 112 | 85  | 2   | 103 | 117 | 106 | 34  | 111 | 99  | 110 | 14  | 77   | -  | 46      |
| 2       | 68              | 72 | 41 | 77  | 87 | 33 | 36 | 92    | 2.4 | 100 | 0   | 97  | 35 | 99  | 8.4 | 119 | 107 | 93  | 2.8 | 109 | 102 | 61  | 5.9 | 108 | 119 | 113 | 7.6 | 107 | 124 | 117 | 66  | 71   | -  | 58      |
| 3       | 59              | 57 | 63 | 81  | 92 | 67 | 40 | 97    | 7.6 | 100 | 0   | 107 | 60 | 104 | 94  | 122 | 117 | 114 | 10  | 124 | 122 | 92  | 6.3 | 114 | 125 | 115 | 33  | 107 | 127 | 116 | 77  | 82   | -  | 47      |
| 4       | 79              | 92 | 80 | 87  | 99 | 80 | 73 | 100   | 27  | 100 | 1.8 | 112 | 88 | 85  | 1.5 | 129 | 121 | 33  | 9.8 | 125 | 122 | 96  | 2.1 | 111 | 116 | 116 | 0   | 108 | 126 | 115 | 51  | 80   | -  | 52      |
| 5       | 68              | 75 | 70 | 93  | 99 | 41 | 68 | 100   | 0   | 100 | 0   | 113 | 35 | 107 | 72  | 124 | 130 | 107 | 18  | 111 | 127 | 73  | 17  | 123 | 132 | 106 | 0.2 | 101 | 137 | 112 | 52  | 81   | -  | 51      |
| 6       | 49              | 71 | 67 | 62  | 90 | 50 | 63 | 85    | 25  | 100 | 0   | 100 | 63 | 86  | 8.8 | 112 | 123 | 99  | 49  | 106 | 117 | 96  | 20  | 113 | 97  | 116 | 6.1 | 93  | 113 | 110 | 43  | 75   | -  | 47      |
| 7       | 18              | 25 | 84 | 47  | 76 | 56 | 76 | 85    | 0.8 | 100 | 0   | 80  | 15 | 81  | 31  | 114 | 114 | 79  | 0.8 | 104 | 137 | 74  | 5.6 | 121 | 134 | 113 | 0   | 108 | 127 | 107 | 33  | 69   | -  | 64      |
| 8       | 27              | 48 | 59 | 49  | 94 | 38 | 29 | 99    | 57  | 100 | 37  | 106 | 59 | 104 | 58  | 87  | 89  | 99  | 37  | 84  | 69  | 84  | 44  | 103 | 86  | 104 | 44  | 92  | 92  | 97  | 59  | 72   | -  | 36      |
| 9       | 45              | 56 | 66 | 59  | 81 | 83 | 45 | 72    | 32  | 100 | 0   | 76  | 84 | 91  | 0.6 | 105 | 101 | 108 | 0   | 95  | 112 | 95  | 0   | 119 | 121 | 109 | 0   | 108 | 127 | 109 | 39  | 72   | -  | 55      |
| 10      | 52              | 46 | 62 | 42  | 91 | 46 | 37 | 105   | 39  | 100 | 0   | 117 | 40 | 100 | 26  | 119 | 84  | 109 | 0   | 95  | 62  | 104 | 32  | 115 | 88  | 112 | 30  | 101 | 95  | 120 | 64  | 72   | -  | 50      |
| 11      | 5.3             | 24 | 43 | 34  | 78 | 38 | 41 | 89    | 0   | 100 | 0   | 113 | 18 | 109 | 22  | 119 | 117 | 98  | 0   | 117 | 125 | 101 | 9.9 | 121 | 136 | 117 | 18  | 110 | 137 | 116 | 68  | 72   | -  | 66      |
| 12      | 0               | 0  | 16 | 0.1 | 24 | 0  | 0  | 88    | 7   | 100 | 24  | 97  | 14 | 96  | 0.1 | 118 | 119 | 115 | 1.2 | 117 | 119 | 83  | 0.4 | 120 | 132 | 113 | 0   | 115 | 138 | 118 | 43  | 62   | -  | 86      |
| Mean    | 45              | 53 | 62 | 59  | 84 | 49 | 46 | 92    | 21  | 100 | 6.1 | 101 | 46 | 96  | 31  | 116 | 111 | 96  | 11  | 108 | 111 | 87  | 12  | 114 | 117 | 112 | 14  | 105 | 120 | 112 | 51  | 74   | -  | 55      |

**b**

|      |     |    |    |     |    |    |    |    |     |    |     |    |    |    |     |     |    |    |     |    |    |    |     |    |    |    |     |    |     |     |    |    |    |   |
|------|-----|----|----|-----|----|----|----|----|-----|----|-----|----|----|----|-----|-----|----|----|-----|----|----|----|-----|----|----|----|-----|----|-----|-----|----|----|----|---|
| 1    | 59  | 55 | 72 | 63  | 75 | 50 | 39 | 74 | 44  | 81 | 7.7 | 79 | 30 | 68 | 41  | 96  | 91 | 81 | 6.4 | 89 | 91 | 69 | 1.6 | 84 | 95 | 86 | 28  | 90 | 80  | 89  | 12 | 62 | 28 | - |
| 2    | 54  | 57 | 33 | 61  | 69 | 26 | 28 | 73 | 1.9 | 79 | 0   | 77 | 28 | 79 | 6.7 | 95  | 85 | 74 | 2.2 | 87 | 81 | 49 | 4.7 | 86 | 95 | 90 | 6.1 | 85 | 98  | 93  | 53 | 57 | 33 | - |
| 3    | 45  | 44 | 48 | 62  | 70 | 51 | 31 | 74 | 5.8 | 76 | 0   | 82 | 46 | 79 | 72  | 93  | 89 | 87 | 7.6 | 94 | 94 | 70 | 4.8 | 87 | 95 | 87 | 26  | 82 | 97  | 88  | 59 | 63 | 30 | - |
| 4    | 60  | 69 | 61 | 65  | 75 | 60 | 55 | 76 | 20  | 76 | 1.4 | 85 | 66 | 65 | 1.1 | 98  | 92 | 25 | 7.4 | 95 | 93 | 73 | 1.6 | 84 | 88 | 88 | 0   | 81 | 96  | 87  | 38 | 61 | 32 | - |
| 5    | 47  | 52 | 49 | 65  | 69 | 29 | 48 | 70 | 0   | 70 | 0   | 79 | 25 | 75 | 50  | 87  | 91 | 75 | 12  | 77 | 89 | 51 | 12  | 86 | 92 | 74 | 0.1 | 71 | 95  | 78  | 36 | 57 | 29 | - |
| 6    | 38  | 55 | 52 | 48  | 70 | 39 | 49 | 65 | 19  | 77 | 0   | 77 | 49 | 67 | 6.8 | 86  | 95 | 77 | 38  | 82 | 90 | 75 | 16  | 87 | 75 | 89 | 4.7 | 72 | 87  | 85  | 33 | 58 | 28 | - |
| 7    | 13  | 18 | 60 | 34  | 54 | 40 | 54 | 61 | 0.6 | 72 | 0   | 57 | 11 | 59 | 23  | 82  | 82 | 57 | 0.6 | 74 | 98 | 54 | 4   | 87 | 96 | 81 | 0   | 78 | 91  | 77  | 24 | 50 | 32 | - |
| 8    | 24  | 44 | 53 | 44  | 85 | 34 | 26 | 89 | 52  | 90 | 34  | 96 | 54 | 94 | 53  | 79  | 80 | 89 | 33  | 76 | 63 | 76 | 39  | 93 | 77 | 94 | 40  | 83 | 83  | 88  | 53 | 65 | 23 | - |
| 9    | 33  | 42 | 49 | 44  | 60 | 61 | 33 | 54 | 24  | 74 | 0   | 56 | 62 | 67 | 0.5 | 78  | 75 | 80 | 0   | 70 | 83 | 70 | 0   | 88 | 90 | 80 | 0   | 80 | 94  | 81  | 29 | 54 | 30 | - |
| 10   | 44  | 39 | 52 | 36  | 77 | 39 | 31 | 88 | 33  | 84 | 0   | 99 | 34 | 85 | 22  | 101 | 71 | 92 | 0   | 80 | 52 | 88 | 27  | 97 | 75 | 95 | 26  | 86 | 80  | 101 | 54 | 61 | 30 | - |
| 11   | 3.7 | 17 | 31 | 24  | 55 | 27 | 29 | 63 | 0   | 71 | 0   | 80 | 13 | 77 | 15  | 84  | 83 | 69 | 0   | 83 | 88 | 72 | 7   | 85 | 96 | 83 | 12  | 78 | 97  | 82  | 48 | 51 | 34 | - |
| 12   | 0   | 0  | 11 | 0.1 | 17 | 0  | 0  | 64 | 5.1 | 72 | 18  | 70 | 10 | 70 | 0   | 86  | 86 | 83 | 0.8 | 85 | 86 | 60 | 0.3 | 87 | 96 | 82 | 0   | 83 | 100 | 85  | 32 | 45 | 39 | - |
| Mean | 35  | 41 | 48 | 46  | 65 | 38 | 35 | 71 | 17  | 77 | 5   | 78 | 36 | 74 | 24  | 89  | 85 | 74 | 9   | 83 | 84 | 67 | 9.8 | 88 | 89 | 86 | 12  | 81 | 92  | 86  | 39 | 57 | -  | - |

**Table S4.** Mean irradiance (of dosimeter C3 values in %) measured by each of the 31 dosimeters on each of the 12 participants with different body shapes in treatment unit D (a). Percent of calibration value for each dosimeter and each person in treatment unit D (b). Person 1 is the shortest and person 12 the tallest.

| a       | Head / Shoulder |     |     |     |     |     |     | Trunk |     |     |     |     |    |    |     | Arm |     |     |     |     |     |     |     | Leg |     |     |     |     |     |     |     | Mean | SD | RSD (%) |
|---------|-----------------|-----|-----|-----|-----|-----|-----|-------|-----|-----|-----|-----|----|----|-----|-----|-----|-----|-----|-----|-----|-----|-----|-----|-----|-----|-----|-----|-----|-----|-----|------|----|---------|
| Subject | H1              | H2  | H3  | H4  | S1  | S2  | S4  | C1    | C2  | C3  | C4  | B1  | B2 | B3 | B4  | UA1 | UA2 | UA3 | UA4 | LA1 | LA2 | LA3 | LA4 | UL1 | UL2 | UL3 | UL4 | LL1 | LL2 | LL3 | LL4 |      |    |         |
| 1       | 0.3             | 0.3 | 0   | 0   | 67  | 0   | 0   | 99    | 7.6 | 100 | 9.3 | 103 | 47 | 93 | 32  | 46  | 84  | 96  | 14  | 84  | 90  | 64  | 25  | 116 | 98  | 114 | 72  | 106 | 93  | 101 | 40  | 58   | -  | 72      |
| 2       | 35              | 23  | 68  | 30  | 86  | 18  | 12  | 124   | 21  | 100 | 24  | 118 | 75 | 68 | 53  | 72  | 110 | 59  | 18  | 103 | 113 | 99  | 37  | 132 | 98  | 119 | 0.2 | 130 | 102 | 127 | 58  | 72   | -  | 56      |
| 3       | 20              | 4   | 0.8 | 7.5 | 76  | 1.7 | 0.1 | 95    | 0.3 | 100 | 6.2 | 102 | 64 | 90 | 51  | 55  | 71  | 102 | 32  | 82  | 89  | 94  | 16  | 113 | 95  | 99  | 51  | 108 | 114 | 108 | 91  | 63   | -  | 65      |
| 4       | 27              | 21  | 83  | 17  | 84  | 36  | 16  | 115   | 15  | 100 | 0   | 123 | 16 | 79 | 9.1 | 56  | 81  | 17  | 9.4 | 92  | 108 | 71  | 0   | 126 | 106 | 125 | 72  | 120 | 132 | 121 | 122 | 68   | -  | 67      |
| 5       | 2.4             | 4.8 | 0   | 6.9 | 61  | 0.1 | 1.3 | 94    | 0   | 100 | 0   | 105 | 20 | 85 | 23  | 40  | 102 | 63  | 17  | 84  | 100 | 72  | 2.6 | 114 | 72  | 105 | 0.6 | 117 | 87  | 108 | 36  | 52   | -  | 83      |
| 6       | 11              | 19  | 88  | 5.9 | 123 | 40  | 48  | 134   | 0   | 100 | 0   | 171 | 15 | 93 | 4.7 | 71  | 168 | 143 | 21  | 146 | 151 | 109 | 17  | 186 | 121 | 173 | 62  | 194 | 132 | 170 | 107 | 91   | -  | 70      |
| 7       | 2.3             | 0.2 | 0   | 0.3 | 27  | 0   | 3.7 | 109   | 0   | 100 | 0   | 110 | 13 | 52 | 24  | 42  | 99  | 57  | 0   | 78  | 80  | 90  | 4.2 | 119 | 98  | 106 | 56  | 107 | 108 | 108 | 93  | 54   | -  | 83      |
| 8       | 16              | 17  | 35  | 11  | 110 | 8.8 | 2.4 | 140   | 30  | 100 | 46  | 142 | 80 | 74 | 40  | 75  | 125 | 77  | 22  | 125 | 105 | 130 | 57  | 156 | 129 | 150 | 96  | 147 | 146 | 150 | 127 | 86   | -  | 59      |
| 9       | 0.1             | 0.4 | 0   | 0   | 19  | 5.5 | 0   | 123   | 0   | 100 | 0.3 | 125 | 17 | 64 | 17  | 32  | 128 | 70  | 0   | 54  | 108 | 109 | 9.7 | 136 | 106 | 126 | 61  | 123 | 133 | 133 | 113 | 62   | -  | 87      |
| 10      | 17              | 12  | 27  | 2.6 | 69  | 2.2 | 4.4 | 127   | 8.8 | 100 | 16  | 131 | 32 | 61 | 45  | 93  | 103 | 106 | 0   | 114 | 72  | 110 | 58  | 139 | 119 | 134 | 83  | 143 | 98  | 128 | 96  | 73   | -  | 66      |
| 11      | 0.2             | 13  | 44  | 9.9 | 92  | 10  | 30  | 102   | 0   | 100 | 0.2 | 121 | 37 | 93 | 29  | 80  | 95  | 61  | 2.8 | 112 | 104 | 102 | 35  | 136 | 100 | 122 | 72  | 131 | 102 | 127 | 86  | 69   | -  | 65      |
| 12      | 0.5             | 2.8 | 35  | 1.4 | 74  | 0.1 | 0   | 114   | 11  | 100 | 41  | 113 | 51 | 95 | 44  | 53  | 104 | 95  | 0.2 | 99  | 110 | 80  | 19  | 127 | 96  | 120 | 70  | 126 | 96  | 123 | 74  | 67   | -  | 66      |
| Mean    | 11              | 9.8 | 32  | 7.7 | 74  | 10  | 9.8 | 115   | 7.8 | 100 | 12  | 122 | 39 | 79 | 31  | 60  | 106 | 79  | 11  | 98  | 103 | 94  | 23  | 133 | 103 | 125 | 58  | 129 | 112 | 125 | 87  | 68   | -  | 70      |

b

|      |     |     |     |     |    |     |     |    |     |    |     |    |     |    |     |    |    |    |     |    |    |    |     |     |    |     |     |     |     |     |    |    |    |   |
|------|-----|-----|-----|-----|----|-----|-----|----|-----|----|-----|----|-----|----|-----|----|----|----|-----|----|----|----|-----|-----|----|-----|-----|-----|-----|-----|----|----|----|---|
| 1    | 0.3 | 0.3 | 0   | 0   | 62 | 0   | 0   | 92 | 7   | 92 | 8.6 | 95 | 44  | 86 | 30  | 42 | 77 | 89 | 13  | 78 | 83 | 59 | 23  | 107 | 90 | 105 | 67  | 98  | 86  | 93  | 37 | 54 | 38 | - |
| 2    | 28  | 18  | 54  | 24  | 68 | 14  | 9.8 | 98 | 17  | 79 | 19  | 93 | 60  | 54 | 42  | 57 | 87 | 47 | 14  | 81 | 89 | 78 | 29  | 104 | 77 | 94  | 0.2 | 102 | 80  | 101 | 46 | 57 | 32 | - |
| 3    | 18  | 3.6 | 0.7 | 6.8 | 68 | 1.6 | 0.1 | 86 | 0.3 | 90 | 5.6 | 92 | 58  | 81 | 46  | 49 | 64 | 92 | 29  | 74 | 80 | 85 | 14  | 102 | 86 | 89  | 46  | 98  | 103 | 97  | 82 | 56 | 37 | - |
| 4    | 21  | 17  | 65  | 14  | 65 | 28  | 12  | 90 | 12  | 78 | 0   | 96 | 13  | 62 | 7.1 | 44 | 63 | 13 | 7.3 | 72 | 84 | 55 | 0   | 98  | 83 | 98  | 56  | 93  | 103 | 95  | 95 | 53 | 36 | - |
| 5    | 2.1 | 4.2 | 0   | 6.1 | 54 | 0.1 | 1.1 | 83 | 0   | 88 | 0   | 92 | 18  | 75 | 20  | 35 | 90 | 56 | 15  | 74 | 89 | 64 | 2.3 | 101 | 64 | 93  | 0.5 | 103 | 77  | 95  | 32 | 46 | 38 | - |
| 6    | 6.4 | 11  | 50  | 3.3 | 70 | 22  | 27  | 76 | 0   | 56 | 0   | 97 | 8.5 | 52 | 2.6 | 40 | 95 | 81 | 12  | 82 | 85 | 61 | 9.8 | 105 | 68 | 98  | 35  | 110 | 75  | 96  | 60 | 51 | 36 | - |
| 7    | 2   | 0.2 | 0   | 0.2 | 23 | 0   | 3.2 | 95 | 0   | 87 | 0   | 95 | 12  | 45 | 21  | 37 | 86 | 50 | 0   | 68 | 70 | 78 | 3.7 | 103 | 85 | 92  | 49  | 93  | 94  | 94  | 81 | 47 | 39 | - |
| 8    | 11  | 11  | 23  | 7.1 | 73 | 5.8 | 1.6 | 93 | 20  | 66 | 31  | 94 | 53  | 49 | 26  | 50 | 83 | 51 | 15  | 83 | 69 | 86 | 38  | 103 | 85 | 99  | 64  | 97  | 97  | 99  | 84 | 57 | 33 | - |
| 9    | 0.1 | 0.3 | 0   | 0   | 14 | 4.1 | 0   | 91 | 0   | 74 | 0.2 | 93 | 13  | 48 | 13  | 24 | 95 | 52 | 0   | 40 | 81 | 81 | 7.2 | 101 | 79 | 94  | 45  | 91  | 99  | 99  | 84 | 46 | 40 | - |
| 10   | 12  | 8.7 | 19  | 1.8 | 49 | 1.5 | 3.1 | 90 | 6.2 | 71 | 11  | 93 | 23  | 43 | 32  | 66 | 72 | 75 | 0   | 81 | 51 | 77 | 41  | 98  | 84 | 94  | 59  | 101 | 69  | 90  | 68 | 51 | 34 | - |
| 11   | 0.1 | 10  | 35  | 7.9 | 74 | 8.1 | 24  | 82 | 0   | 80 | 0.1 | 97 | 30  | 75 | 23  | 64 | 76 | 49 | 2.2 | 90 | 84 | 82 | 28  | 109 | 80 | 98  | 58  | 105 | 81  | 102 | 69 | 56 | 36 | - |
| 12   | 0.4 | 2.3 | 29  | 1.2 | 60 | 0.1 | 0   | 94 | 8.7 | 82 | 34  | 93 | 42  | 77 | 36  | 44 | 85 | 78 | 0.2 | 81 | 90 | 66 | 16  | 104 | 79 | 99  | 57  | 103 | 79  | 101 | 61 | 55 | 36 | - |
| Mean | 8.4 | 7.2 | 23  | 6   | 57 | 7.2 | 6.8 | 89 | 5.9 | 79 | 9   | 94 | 31  | 62 | 25  | 46 | 81 | 61 | 8.9 | 75 | 79 | 73 | 18  | 103 | 80 | 96  | 45  | 100 | 87  | 97  | 67 | 52 | -  | - |

**Table S5.** Mean irradiance (of dosimeter C3 values in %) measured by each of the 31 dosimeters on each of the 12 participants with different body shapes in treatment unit E (a). Percent of calibration value for each dosimeter and each person in treatment unit E (b). Person 1 is the shortest and person 12 the tallest.

| a       | Head / Shoulder |    |    |    |    |     |     | Trunk |    |     |    |     |    |     |    | Arm |     |     |     |     |     |     |     | Leg |     |     |     |     |     |     |     | Mean | SD | RSD (%) |
|---------|-----------------|----|----|----|----|-----|-----|-------|----|-----|----|-----|----|-----|----|-----|-----|-----|-----|-----|-----|-----|-----|-----|-----|-----|-----|-----|-----|-----|-----|------|----|---------|
| Subject | H1              | H2 | H3 | H4 | S1 | S2  | S4  | C1    | C2 | C3  | C4 | B1  | B2 | B3  | B4 | UA1 | UA2 | UA3 | UA4 | LA1 | LA2 | LA3 | LA4 | UL1 | UL2 | UL3 | UL4 | LL1 | LL2 | LL3 | LL4 |      |    |         |
| 1       | 46              | 39 | 33 | 43 | 76 | 23  | 24  | 90    | 57 | 100 | 44 | 113 | 68 | 103 | 76 | 68  | 13  | 76  | 30  | 78  | 5.4 | 73  | 78  | 88  | 48  | 96  | 69  | 104 | 64  | 105 | 41  | 64   | -  | 45      |
| 2       | 52              | 42 | 52 | 43 | 65 | 33  | 30  | 90    | 39 | 100 | 31 | 115 | 67 | 107 | 67 | 71  | 30  | 90  | 14  | 81  | 48  | 91  | 33  | 114 | 64  | 109 | 29  | 109 | 59  | 112 | 74  | 66   | -  | 45      |
| 3       | 53              | 42 | 70 | 54 | 76 | 34  | 24  | 88    | 85 | 100 | 41 | 112 | 71 | 104 | 83 | 84  | 26  | 73  | 28  | 94  | 24  | 80  | 79  | 110 | 67  | 110 | 43  | 97  | 70  | 103 | 56  | 70   | -  | 39      |
| 4       | 52              | 47 | 73 | 48 | 84 | 26  | 21  | 91    | 72 | 100 | 64 | 119 | 82 | 105 | 74 | 74  | 75  | 55  | 8.8 | 97  | 16  | 79  | 71  | 107 | 34  | 102 | 99  | 92  | 31  | 87  | 120 | 71   | -  | 42      |
| 5       | 40              | 38 | 10 | 43 | 58 | 23  | 22  | 71    | 43 | 100 | 44 | 113 | 95 | 105 | 51 | 71  | 16  | 88  | 27  | 79  | 14  | 80  | 30  | 104 | 68  | 92  | 22  | 86  | 36  | 86  | 76  | 59   | -  | 52      |
| 6       | 47              | 48 | 62 | 49 | 74 | 22  | 19  | 65    | 80 | 100 | 36 | 119 | 73 | 111 | 71 | 65  | 21  | 90  | 56  | 92  | 8.6 | 92  | 61  | 114 | 85  | 108 | 68  | 95  | 59  | 105 | 77  | 70   | -  | 42      |
| 7       | 44              | 37 | 70 | 41 | 40 | 25  | 22  | 73    | 60 | 100 | 44 | 114 | 85 | 107 | 76 | 68  | 25  | 83  | 15  | 80  | 14  | 80  | 18  | 94  | 15  | 94  | 56  | 74  | 31  | 76  | 70  | 59   | -  | 49      |
| 8       | 53              | 47 | 69 | 47 | 76 | 37  | 31  | 92    | 55 | 100 | 62 | 111 | 64 | 102 | 78 | 77  | 27  | 84  | 19  | 74  | 38  | 97  | 62  | 108 | 52  | 102 | 83  | 82  | 44  | 84  | 63  | 68   | -  | 36      |
| 9       | 55              | 42 | 0  | 60 | 50 | 28  | 32  | 94    | 65 | 100 | 61 | 115 | 80 | 107 | 73 | 79  | 10  | 30  | 9.6 | 88  | 24  | 32  | 58  | 104 | 58  | 93  | 36  | 86  | 56  | 92  | 56  | 61   | -  | 50      |
| 10      | 56              | 45 | 61 | 43 | 58 | 24  | 25  | 79    | 40 | 100 | 26 | 111 | 50 | 89  | 27 | 76  | 16  | 69  | 5   | 89  | 25  | 84  | 70  | 112 | 63  | 102 | 60  | 97  | 67  | 89  | 67  | 62   | -  | 47      |
| 11      | 34              | 40 | 68 | 39 | 67 | 24  | 21  | 71    | 59 | 100 | 61 | 113 | 76 | 104 | 81 | 60  | 19  | 82  | 18  | 86  | 17  | 86  | 54  | 104 | 44  | 93  | 64  | 84  | 46  | 76  | 73  | 63   | -  | 43      |
| 12      | 34              | 45 | 77 | 42 | 72 | 7.5 | 6.9 | 79    | 71 | 100 | 55 | 118 | 79 | 113 | 89 | 78  | 10  | 52  | 8.8 | 95  | 0.2 | 101 | 58  | 135 | 84  | 133 | 59  | 119 | 77  | 124 | 80  | 71   | -  | 54      |
| Mean    | 47              | 43 | 54 | 46 | 66 | 26  | 23  | 82    | 61 | 100 | 47 | 114 | 74 | 105 | 70 | 73  | 24  | 73  | 20  | 86  | 20  | 81  | 56  | 108 | 57  | 103 | 57  | 94  | 53  | 95  | 71  | 65   | -  | 45      |

**b**

|      |    |    |     |    |    |     |     |    |    |    |    |     |    |     |    |    |     |    |     |    |     |    |    |     |    |    |    |    |    |    |     |    |    |   |
|------|----|----|-----|----|----|-----|-----|----|----|----|----|-----|----|-----|----|----|-----|----|-----|----|-----|----|----|-----|----|----|----|----|----|----|-----|----|----|---|
| 1    | 44 | 36 | 31  | 40 | 71 | 22  | 22  | 84 | 53 | 94 | 41 | 106 | 64 | 97  | 71 | 64 | 13  | 71 | 28  | 74 | 5.1 | 69 | 73 | 83  | 45 | 90 | 65 | 98 | 60 | 98 | 38  | 60 | 27 | - |
| 2    | 46 | 38 | 46  | 38 | 58 | 29  | 27  | 80 | 35 | 89 | 27 | 102 | 59 | 95  | 60 | 63 | 27  | 80 | 13  | 72 | 42  | 81 | 29 | 101 | 57 | 97 | 26 | 97 | 52 | 99 | 66  | 59 | 27 | - |
| 3    | 46 | 37 | 62  | 48 | 67 | 30  | 21  | 78 | 75 | 88 | 36 | 99  | 63 | 92  | 73 | 74 | 23  | 64 | 25  | 83 | 21  | 70 | 69 | 97  | 59 | 97 | 38 | 86 | 62 | 91 | 49  | 62 | 24 | - |
| 4    | 46 | 42 | 64  | 43 | 75 | 23  | 19  | 81 | 64 | 89 | 57 | 106 | 73 | 93  | 66 | 66 | 67  | 49 | 7.8 | 86 | 14  | 70 | 63 | 95  | 30 | 90 | 88 | 82 | 28 | 77 | 107 | 63 | 27 | - |
| 5    | 38 | 36 | 9.4 | 41 | 55 | 22  | 20  | 68 | 41 | 95 | 41 | 107 | 90 | 99  | 49 | 67 | 15  | 83 | 26  | 74 | 14  | 76 | 29 | 98  | 65 | 87 | 21 | 81 | 34 | 81 | 72  | 56 | 29 | - |
| 6    | 42 | 43 | 55  | 44 | 66 | 19  | 17  | 58 | 72 | 89 | 33 | 107 | 66 | 100 | 63 | 58 | 19  | 81 | 50  | 82 | 7.7 | 82 | 54 | 102 | 76 | 97 | 60 | 85 | 52 | 94 | 69  | 63 | 26 | - |
| 7    | 43 | 36 | 68  | 40 | 39 | 25  | 21  | 72 | 59 | 98 | 43 | 111 | 83 | 104 | 74 | 66 | 24  | 81 | 15  | 78 | 14  | 78 | 18 | 92  | 15 | 92 | 54 | 72 | 30 | 74 | 68  | 58 | 29 | - |
| 8    | 49 | 43 | 63  | 43 | 69 | 34  | 28  | 84 | 50 | 92 | 57 | 102 | 58 | 93  | 72 | 70 | 24  | 77 | 17  | 68 | 35  | 89 | 57 | 99  | 47 | 93 | 76 | 75 | 41 | 77 | 58  | 63 | 23 | - |
| 9    | 51 | 39 | 0   | 56 | 47 | 27  | 30  | 88 | 61 | 94 | 57 | 108 | 75 | 100 | 68 | 75 | 9.7 | 28 | 9   | 82 | 22  | 30 | 55 | 97  | 55 | 88 | 34 | 81 | 53 | 86 | 53  | 57 | 29 | - |
| 10   | 51 | 40 | 55  | 39 | 52 | 21  | 23  | 71 | 37 | 90 | 23 | 100 | 45 | 80  | 24 | 69 | 14  | 62 | 4.5 | 80 | 22  | 75 | 63 | 101 | 57 | 92 | 54 | 88 | 60 | 80 | 60  | 56 | 26 | - |
| 11   | 33 | 39 | 66  | 38 | 65 | 23  | 20  | 68 | 57 | 97 | 59 | 109 | 73 | 100 | 79 | 58 | 18  | 79 | 17  | 84 | 16  | 83 | 52 | 101 | 42 | 90 | 62 | 82 | 44 | 73 | 70  | 61 | 26 | - |
| 12   | 25 | 33 | 56  | 31 | 53 | 5.5 | 5.1 | 58 | 52 | 73 | 40 | 86  | 58 | 83  | 65 | 57 | 7.5 | 38 | 6.5 | 69 | 0.1 | 74 | 42 | 98  | 62 | 97 | 43 | 87 | 56 | 91 | 58  | 52 | 28 | - |
| Mean | 43 | 39 | 48  | 42 | 60 | 23  | 21  | 74 | 55 | 91 | 43 | 104 | 67 | 95  | 64 | 66 | 22  | 66 | 18  | 78 | 18  | 73 | 50 | 97  | 51 | 92 | 52 | 84 | 48 | 85 | 64  | 59 | -  | - |
